# Supplementary material
Source: publisher site journal article supplement (https://www.dovepress.com/article/445141)
Supplement: Supplementary file 1 [file get_supplementary_file.php]

# Supplementary Appendix

**Table S1** One-way sensitivity analysis inputs

| **Input Parameters** | **Deterministic Input** | **Lower Bound** | **Upper Bound** | **OWSA bounds source** |
| --- | --- | --- | --- | --- |
| ***Base Case Inputs*** | | | | |
| LOS O-TLIF (days) | 8.1 | 7.7 | 8.42 | 95% CI calculated from  Miller (2020)18 |
| LOS reduction (MI-TLIF vs. O-TLIF; days) | 2.2 | 1.70 | 2.70 | Miller (2020)18 |
| Blood loss (O-TLIF; mL) | 434.17 | 415.38 | 452.96 | 95% CI calculated from  Miller (2020)18 |
| Blood loss reduction (MI-TLIF vs. O-TLIF; mL) | 200 | 93 | 307 | Miller (2020)18 |
| Number of surgical trays requiring sterilization in MI-TLIF | 1 | 1 | 2 | ±20% |
| Number of surgical trays requiring sterilization in O-TLIF | 5 | 4 | 6 | ±20% |
| LOS cost per day (€) | 978.53 | 782.82 | 1,174.24 | ±20% |
| RBC cost per unit for blood loss (€) | 337.62 | 270.10 | 405.14 | ±20% |
| Sterilization cost per surgical tray (€) | 70.58 | 56.46 | 84.70 | ±20% |
| Device cost difference between O‑TLIF and MI-TLIF (€) | 530.2 | 424.16 | 636.24 | ±20% |
| ***Scenario Analysis Inputs*** | | | | |
| LOS O-TLIF (days) | 8.3 | 7.94 | 8.66 | 95% CI calculated from Hammad (2019)10 |
| LOS reduction (MI-TLIF vs. O-TLIF; days) | 1.95 | 1.17 | 2.73 | Hammad (2019)10 |
| Blood loss (O-TLIF; mL) | 624.51 | 594.49 | 654.53 | 95% CI calculated from  Hammad (2019)10 |
| Blood loss reduction (MI-TLIF vs. O-TLIF; mL) | 341.89 | 255.1 | 428.69 | Hammad (2019)10 |
| Number of surgical trays requiring sterilization in MI-TLIF | 1 | 1 | 2 | ±20% |
| Number of surgical trays requiring sterilization in O-TLIF | 5 | 4 | 6 | ±20% |
| OR time (O-TLIF; minutes) | 177.9 | 174.62 | 181.18 | 95% CI calculated from Hammad (2019)10 |
| OR time increase (MI-TLIF vs. O-TLIF; minutes) | 6.17 | -36.44 | 48.77 | Hammad (2019)10 |
| Complication rate (O-TLIF; %) | 0.142 | 0.11 | 0.17 | 95% CI calculated from Hammad (2019)10 |
| Complication rate odds ratio (MI-TLIF vs. O-TLIF; %) | 0.7 | 0.48 | 1.00 | Hammad (2019)10 |
| LOS cost per day (€) | 978.53 | 782.82 | 1,174.24 | ±20% |
| RBC cost per unit for blood loss (€) | 337.62 | 270.10 | 405.14 | ±20% |
| Sterilization cost per surgical tray (€) | 70.58 | 56.46 | 84.70 | ±20% |
| Device cost difference between O‑TLIF and MI-TLIF (€) | 530.20 | 424.16 | 636.24 | ±20% |
| OR cost per minute (€) | 29.60 | 23.68 | 35.52 | ±20% |
| Complication cost (scenario analysis only) | 543.87 | 435.10 | 652.64 | ±20% |

**Abbreviations:** CI = confidence interval; LOS = length of stay; MI-TLIF: minimally-invasive transforaminal lumbar interbody fusion; OR = operating room; O-TLIF: open transforaminal lumbar interbody fusion; RBC = red blood cell.
